# Supplementary material
Source: publisher figshare collection journal article supplement (https://acs.figshare.com/ndownloader/files/22129059)
Supplement: Supplementary file 1 [file 22129059]

Compound	SMILES	EC50 - Towne (µM)	EC50 - GCVR Towne (µM)	EC50 - TB40 (µM)	CC50 (µM)	Slope	EC50 - HSV1-CI (µM)	HSV2	EBV (µM)	EC50 - MCMV (µM)
MLS000108969	O=C(NC1=CC=C(NC(C2=CC=CO2)=O)C=C1)C3=CC(Cl)=CC=C3OC	0.55±0.1	0.25±0.1	0.12±0.0	>500	0.64±0.1	NA	NA	>10	NA
NCGC00121827	O=C(NCCCN1CCN(CC)CC1)C(C=C2)=CC3=C2N4C(S3)=NC(C5=CC=C(OC)C=C5)=C4	0.85±0.1	0.84±0.1	1.21±0.1	70.9	1.27±0.1	NA	NA	1.92±0.1	NA
MLS001158554	O=C(N[C@@H](CC1=CNC2=C1C=CC=C2)C(NC3=CC=C(CC)C=C3)=O)[C@H]4NCC5=CC=CC=C5C4	0.64±0.1	0.17±0.0	0.34±0.0	86	1.02±0.1	1.78±0.2	1.34±0.1	NA	11.67±2.0
MLS000558091	O=S(C1=C(N)N(CC2=CC=CC=C2)C3=NC4=CC=CC=C4N=C31)(C5=CC=CS5)=O	0.39±0.0	0.26±0.0	0.33±0.0	>250	1.37±0.3	NA	NA	>10	NA
NCGC00112955	O=C(N1CCC(C(NC(C)C)=O)CC1)C2=CC3=C(C=CS3)N2CC4=CC=C(Cl)C=C4	4.61±1.4	1.4±0.2	1.18±0.2	>200	0.80±0.1	NA	NA	NA	1.0±0.0
Ganciclovir (GCV)	C1=NC2=C(N1COC(CO)CO)N=C(NC2=O)N	2.1±0.3	29.7±1.2	0.72±0.0	>200	0.93±0.1	0.04±0.0	0.58±0.0	5.2±0.4	0.96±0.1
